# Supplementary material for: Responding to Elder Abuse in GERiAtric care (REAGERA) educational intervention for healthcare providers: a non-randomised stepped wedge trial
Source: HighWire-hosted journal article supplement (doi:10.1136/bmjopen-2021-060314), 2022-05-01
Supplement: bmjopen-2021-060314supp003_data_supplement.pdf [file bmjopen-2021-060314supp003_data_supplement.pdf]

## Förfrågan om medverkan i forskningsstudie om sjukvårdens ansvar i mötet med utsatta äldre

Vi vill fråga dig om du vill delta i ett forskningsprojekt. I det här dokumentet får du information om projektet och om vad det innebär att delta.

### Vad är det för projekt och varför vill ni att jag ska delta?

Det är relativt vanligt att äldre män och kvinnor är, eller har varit, utsatta för kränkningar, våld och/eller övergrepp. Att ha varit utsatt för sådana negativa händelser kan påverka hälsan. REAGERA (Responding to Elder Abuse in GERiatric care) är ett forskningsprojekt vars långsiktiga mål är att förbättra vårdens omhändertagande av äldre utsatta för övergrepp.

Under kommande utbildningsdag kommer du få vara med om en heldagsutbildning som handlar om äldres utsatthet för övergrepp och det ansvar som hälso- och sjukvårdspersonal har i mötet med patienter som är eller har varit utsatta för övergrepp. Utbildningsinsatsen vänder sig till personal som i sitt arbete möter äldre patienter. Alla som inbjuds att delta i utbildningen tillfrågas också om att delta i forskningsprojektet vars syfte är att undersöka effekten av utbildningsinsatsen.

Forskningshuvudman för projektet är Region Östergötland.

### Hur går studien till?

Att delta innebär att svara på den webenkät du kommer till om du klickar på länken i slutet på detta brev, vilket beräknas ta mellan 5 och 15 minuter. Frågorna handlar om sjukvårdens arbete med äldre utsatta för övergrepp och dina egna erfarenheter av att möta utsatta äldre. Du kommer även få förfrågningar om att svara på uppföljande webenkäter. Ett mindre antal personer kommer också att tillfrågas om att delta i en intervjustudie. Förfrågan om deltagande i denna studie kommer att skickas ut separat och även om du svarar på enkäten kan du tacka nej till att delta i intervjun. Du kan också låta bli att svara på enkäten men ändå tacka ja till att delta i intervjustudien. Oavsett om du väljer att vara med i någon del av studien eller inte kommer du erbjudas att vara med på utbildningsdagen.

### Möjliga följder och risker med att delta i studien

Studien berör ett ämne, övergrepp mot äldre, som kan väcka känslor och eventuellt obehag. Om du har behov av stöd och hjälp för att hantera detta finns bifogat ett informationsblad med viktiga instanser i samhället dit man kan vända sig för att få hjälp. Detta gäller både om man själv är eller har varit utsatt för övergrepp, om det handlar om en anhörig eller om du har frågor kring hur du kan hjälpa en patient.

## Vad händer med mina uppgifter?

Projektet kommer att samla in och registrera information om dig. Den information vi kommer ha tillgång till och spara är den som du lämnar i dina svar i webenkäten. Dina svar i webenkäten är personliga för att vi ska kunna följa utvecklingen över tid. Alla resultat som offentliggörs kommer dock redovisas på gruppnivå. Vi behandlar informationen om dig i forskningssyfte vilket är av allmänt intresse och anledningen till att vi får behandla informationen enligt gällande lagstiftning.

Datamaterialet kommer att förvaras så att inga obehöriga kan ta del av dem och lagras under minst 10 år. Under datainsamlingsperioden kommer data hanteras av företaget Webropol. Därefter kommer grunddata och kodnyckel förvaras i en mapp på Region Östergötlands intranät som bara forskargruppen har tillgång till. Kodade datafiler kommer också hanteras inom Linköpings Universitets datasystem.

## Dina svar och dina resultat kommer att behandlas så att inte obehöriga kan ta del av dem.

Ansvarig för dina personuppgifter är Region Östergötland. Enligt EU:s dataskyddsförordning har du rätt att kostnadsfritt få ta del av de uppgifter om dig som hanteras i studien, och vid behov få eventuella fel rättade. Du kan också begära att uppgifter om dig raderas samt att behandlingen av dina personuppgifter begränsas. Om du vill ta del av uppgifterna ska du kontakta Johanna Simmons, [johanna.simmons@regionostergotland.se](mailto:johanna.simmons@regionostergotland.se) telefon 010-1031057. Dataskyddsombud nås via e-post: [dataskyddsombud@regionostergotland.se](mailto:dataskyddsombud@regionostergotland.se). Om du är missnöjd med hur dina personuppgifter behandlas har du rätt att ge in klagomål till Datainspektionen, som är tillsynsmyndighet.

## Hur får jag information om resultatet av studien?

Resultatet kommer användas för forskningsändamål samt som underlag i utvecklingsarbete och presenteras i vetenskapliga rapporter och tidskrifter. Du är välkommen att kontakta forskningsledaren, Johanna Simmons, [johanna.simmons@regionostergotland.se](mailto:johanna.simmons@regionostergotland.se) om du vill ha tillgång till dina egna individuella data eller resultatet av hela studien.

## Försäkring och ersättning

Ingen ytterligare försäkring än de som arbetsgivaren tillhandahåller anställda har tecknats för deltagande i studien.

Ingen ekonomisk ersättning utgår för deltagande i studien.

## Deltagandet är frivilligt

Ditt deltagande är frivilligt och du väljer själv vilka frågor i webenkäten du vill svara på. Det är också möjligt att börja svara på enkäten men avbryta utan att skicka in svaren. Om du väljer att inte delta eller vill avbryta ditt deltagande behöver du inte uppge varför, och det kommer inte heller att påverka din möjlighet att delta i utbildningsinsatsen.

## Har du frågor om studien?

Om du vill ställa frågor om studien eller någon del av den här informationen innan du bestämmer dig för om du vill delta, kontakta ansvarig forskare enligt nedan.

## Ansvarig för studien

Johanna Simmons

Medicine doktor, ST-läkare i geriatrik

Medicinska och geriatriska akutkliniken

Universitetssjukhuset i Linköping

e-post: [johanna.simmons@regionostergotland.se](mailto:johanna.simmons@regionostergotland.se)

Telefon: 010-1031057

## Samtycke till att delta i studien

- Jag samtycker till att delta i studien REAGERA – Sjukvårdens ansvar i mötet med utsatta äldre. Personalintervention.
- Jag samtycker till att uppgifter om mig behandlas på det sätt som beskrivs i forskningspersonsinformationen.

Länk till webenkäten
